# Supplementary material for: Current potential of CH 4 emission estimates using TROPOMI in the Middle East
Source: Copernicus journal article supplement (doi:10.5194/amt-17-5261-2024), 2024-09-06
Supplement: Supplementary file 1 [file amt-17-5261-2024-supplement.pdf]

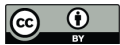

*Supplement of*

## **Current potential of CH<sub>4</sub> emission estimates using TROPOMI in the Middle East**

**Mengyao Liu et al.**

*Correspondence to:* Mengyao Liu ([mengyao.liu@knmi.nl](mailto:mengyao.liu@knmi.nl))

The copyright of individual parts of the supplement might differ from the article licence.

## S1. Select reliable TROPOMI XCH<sub>4</sub> observations

The selection based on two aspects, daily AOD value for each pixel and a new water-land mask to identify pixels over coastlines.

The way to find AOD for each pixel is consisted of two steps. (1) Check if any MODIS observations of AOD at 550nm are available within a 0.2° radial area of the pixel center. Use the median value of these MODIS AODs to stand for the AOD of this pixel if the presumption is true. (2) If there are no available MODIS observations, use the AOD value from global hourly Atmospheric Composition Reanalysis 4 (EAC4) that is constrained by MODIS observation instead. The method to build the constrained daily AOD from EAC4 is as follow:

First, we build monthly mean of MODIS AOD on a grid of 0.75°, which is the same resolution as EAC4 dataset. For the grid cell without any observations in a month, we apply a spatial interpolation starting from surrounding  $\pm 2$  grid cells until finding the available MODIS observations. In the meanwhile, the monthly mean of EAC4 AOD is generated by sampling grid cells at the same overpass time as MODIS pixels and performing the same spatial interpolation process. Thus, the consistence between monthly MODIS AOD and CAMS AOD is ensured. Then the daily AOD of a TROPOMI pixel that has no MODIS observation is estimated by:

$$AOD_T = \frac{AOD_{MODIS}^m}{AOD_{ECA}^m} \cdot AOD_{ECA}^d \quad (S1)$$

$AOD_T$  stands for the estimated daily AOD for a TROPOMI pixel missing a MODIS observation.  $AOD_{MODIS}^m$  and  $AOD_{ECA}^m$  are monthly means of MODIS and ECA AOD after the same spatial interpolation aforementioned, respectively.  $AOD_{ECA}^d$  is the daily AOD from ECA. The calculation of Eq. (S1) is on a grid of 0.75°.

We selected pixels locating at several 1° × 1° areas covering half land and half ocean at the coastlines of such as Oman, Yemen and along Red Sea. We found there are not too many anomalous between pixels over land and ocean. Figure S2 shows an example of a 1° × 1°

area of [18.5-19.5°N 56.8-57.8°E] covering one part of the coastline of Oman. There are only three months in 2019 that have the valid observation. The values of AOD over land and ocean are quite consistent due to the transport. Although we can see the significance of albedo between pixels over land and over ocean, there are not big difference for XCH4

## S2. Procedure to build the non-divergent wind field

The Flux-Divergence method operates on the assumption that any divergence in the flux of a target gas results from the presence of its sources and sinks. However, the flux ( $F$ ) is determined by the product of the gas ( $\Delta XCH_4^{PBL}$  in this study, use  $V$  to represent the vertical column density in Eq. (1)) and the wind velocity ( $w$ ).

By applying the chain rule, we obtain:

$$\nabla \cdot F = \nabla \cdot (V\vec{w}) = (\nabla V) \cdot \vec{w} + V(\nabla \cdot \vec{w}) \quad (S2)$$

A segment of the flux divergence is attributed to variations in the wind field, unrelated to the emission or deposition. At a global level, wind divergence arises from the movement between low-pressure and high-pressure zones. Additionally, larger-scale factors like mountain ranges, coastlines, and other topographic features can contribute to divergence. On a more localized level, interpolating the ECMWF wind field grid onto a regular grid may also introduce some divergence in the wind field. In order to find a flux-field for which  $\nabla \cdot \vec{w}$  is minimized, and thus  $\nabla(\nabla \cdot \vec{w})$  approaches zero, we followed the method proposed by Sims (2018):

Assume  $\vec{w}$  contains divergence. Iterate:

1. Compute the divergence of  $\vec{w}_k$ :  $\nabla \cdot \vec{w}_k$
2. Compute the gradient of the divergence:  $\nabla(\nabla \cdot \vec{w}_k)$ .
3. Update vector field:  $\vec{w}_{k+1} = \vec{w}_k + m\nabla(\nabla \cdot \vec{w}_k)$ .

$m$  is used to scale the update. Stopping Criterion:  $|\vec{w}_{k+1} - \vec{w}_k| < 10^{-5}$  or  $k > 10000$ .

The principle of this algorithm is based on the observation that an area has negative divergence when more flux enters a domain than leaves it. Conversely, a domain has positive divergence when it has a net outflow of particles. Therefore, divergence can be diminished by adding flow away from the area with a negative divergence, and towards areas with a positive divergence. Repeatedly adding the gradient of the divergence to a

vector field achieves this, as the gradient is an arrow pointing from low-divergence areas to high-divergence areas.

This algorithm is similar to the Newton-Raphson technique that iteratively approximates the root of a function by continuously adding the derivative of a function to an initial guess for the root. As the gradient of the divergence becomes smaller when a local minimum is reached, the update to the vector field also becomes smaller.

A side note on the implementation of the algorithm is that the units of the original vector field ( $F$ ) and the vector field we use as update ( $\nabla(\nabla \cdot F)$ ) are different. In the specific implementation of wind vector field ( $\vec{w}$ ), the units of the original vector field are m/s, whereas the gradient of the divergence has units  $1/(m \cdot s)$ . To compensate for this, it was chosen to multiply the gradient of the divergence by the dimensions of the grid cells  $\Delta x$  and  $\Delta y$ . Thus, the scaling factor then becomes  $m \cdot \Delta x \cdot \Delta y$ .

It is also important to note that the algorithm is applied to the wind field after interpolation, as interpolation also introduces small-scale divergence. In each iteration, the absolute value of the divergence is summed over the research domain. When the decline of this metric is smaller than  $10^{-5}$ , the algorithm is terminated. The sum over the divergence lies in the order of magnitude of  $10^{-1}$ . A limit of 10000 iterations is also implemented, in case the metric does not converge.

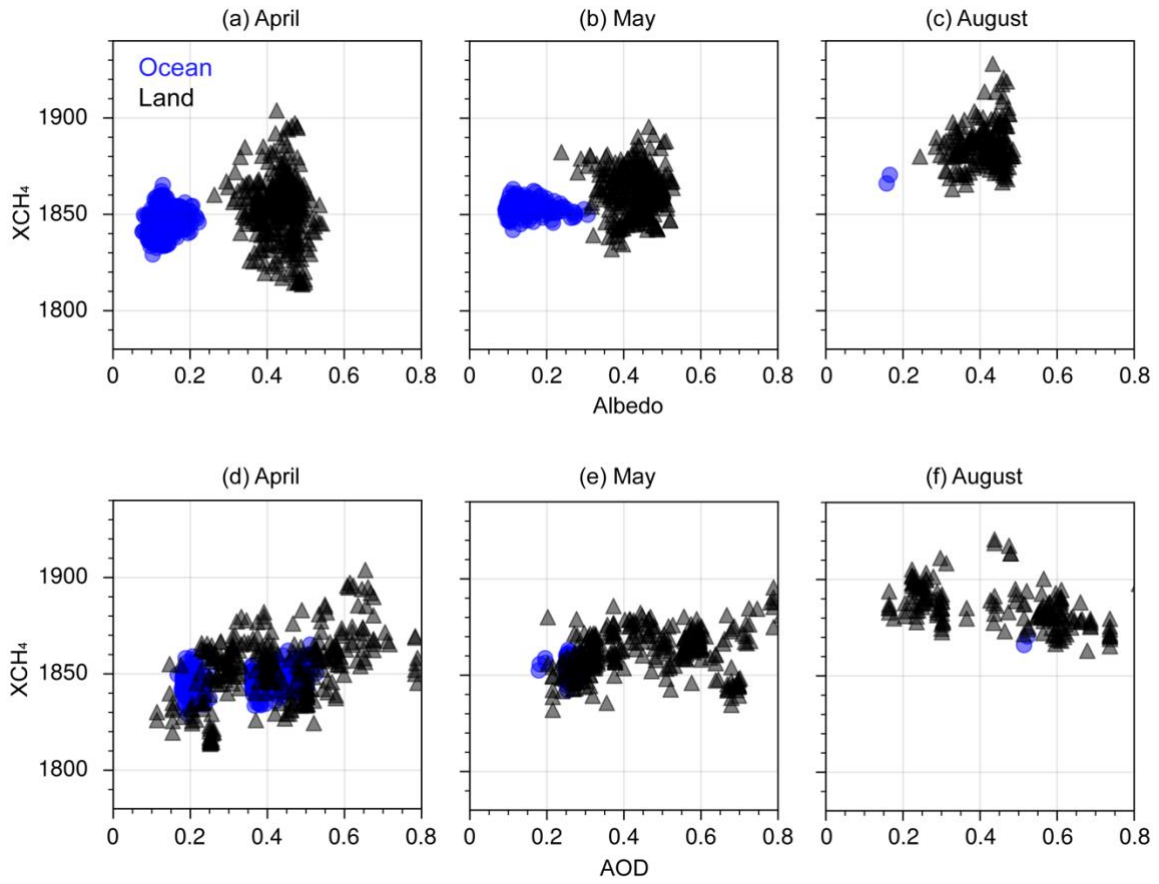

**Figure S1.** The monthly scatter plots for XCH<sub>4</sub> and albedo in (a) April, (b) May and (c) August in 2022. (d)-(f) are similar to (a)-(c) but for XCH<sub>4</sub> and AOD. Each blue dot or black triangle stands for one pixel locating in the area of [18.5-19.5°N 56.8-57.8°E].

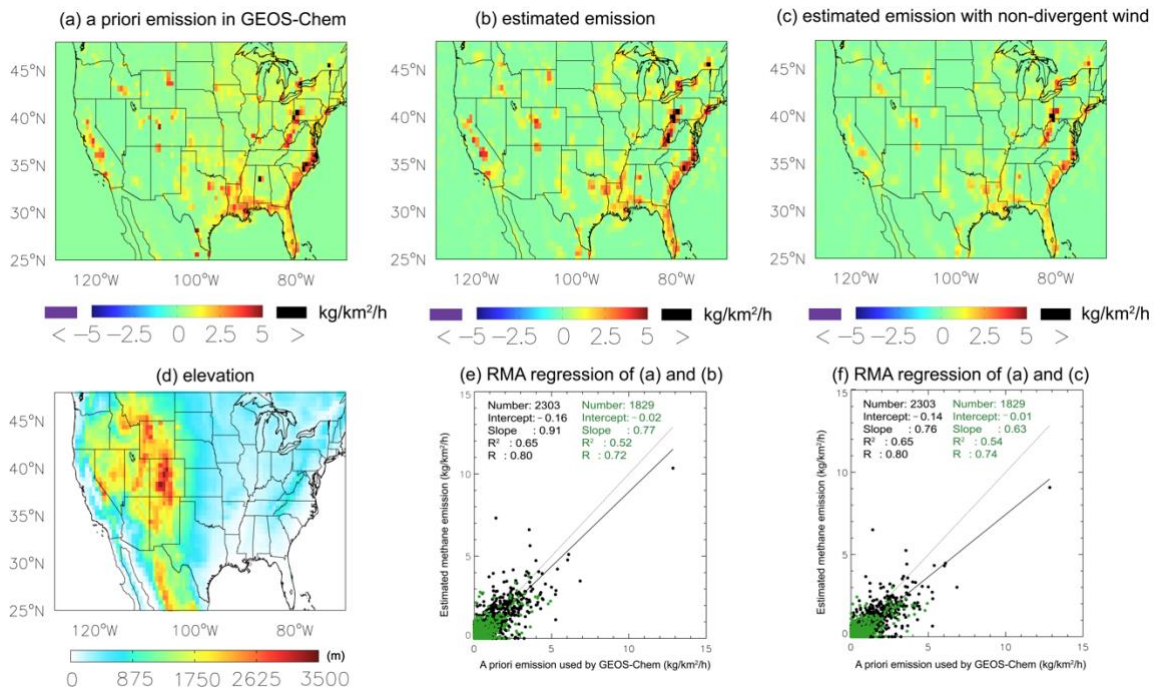

**Figure S2.** The spatial distributions of (a) the average of a priori CH<sub>4</sub> emissions used in GEOS-Chem simulation, (b) corresponding estimated CH<sub>4</sub> emissions over June-August 2012 on a 0.625° lon. 0.5° lat. grid in Liu et al., (2021). (c) The estimated CH<sub>4</sub> emissions by using the non-divergent wind. (d) The elevation map that is generated from GMTED2010 data set. (e) Scatter plots for emissions between a priori emissions estimated CH<sub>4</sub> emissions in (b) The black and green dots stand for the grid cells in the east [100°W-70°W, 25°N-48°N] and west [124°W-100°W, 25°N-48°N] of the domain.

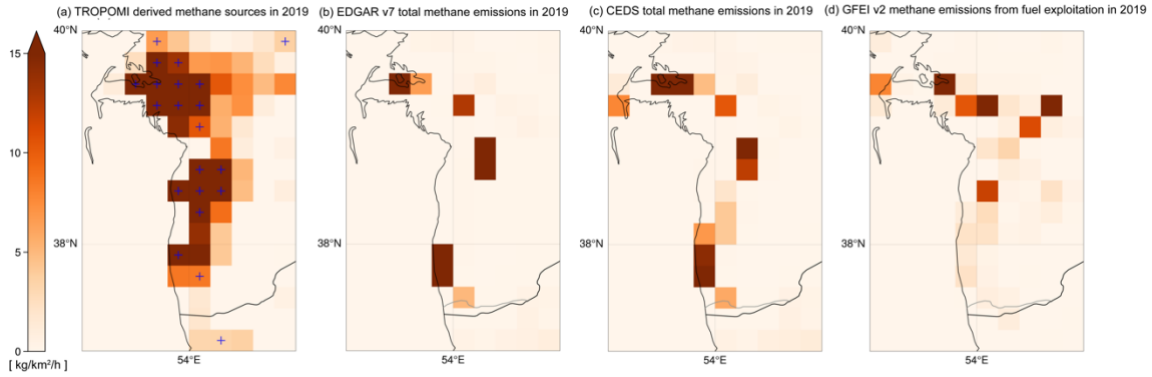

**Figure S3.** (a) The spatial distributions of annual methane emissions derived from TROPOMI XCH<sub>4</sub> over west of Turkmenistan in 2019. The sources passing the temporal filter are marked with blue “+”. (b) EDGAR v7.0 averaged annual methane total emission in 2019. (c) CEDS v\_2021\_04\_21 averaged annual total methane emissions in 2019. (d) GFEI v2 averaged annual methane emissions from the fuel exploitation in 2019.

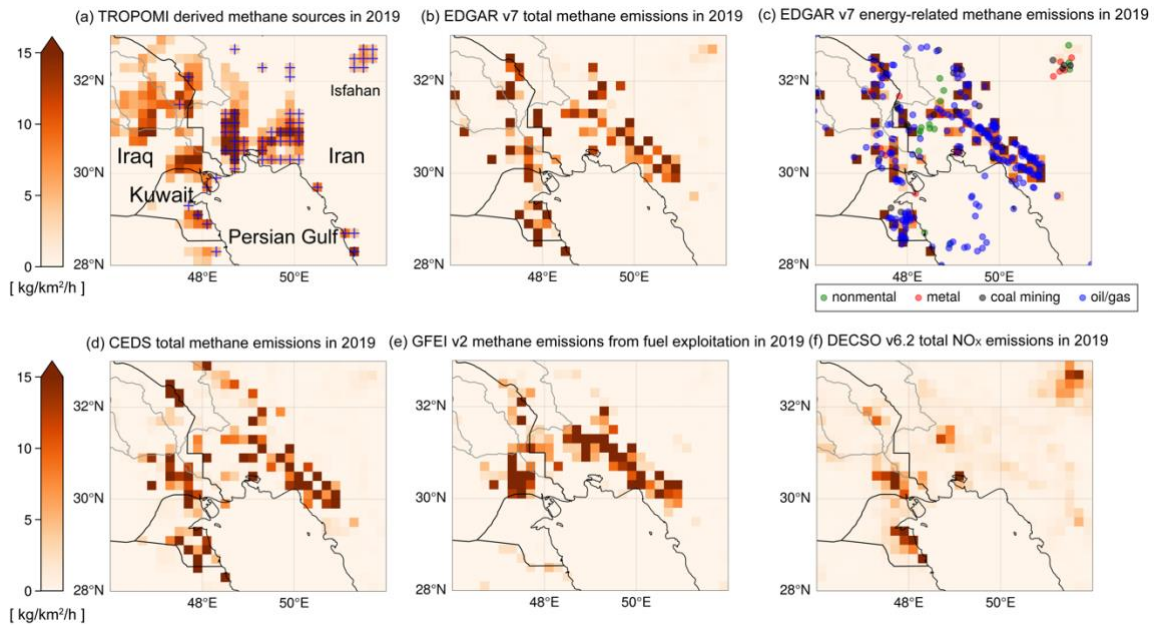

**Figure S4.** (a) The spatial distributions of annual methane emissions derived from TROPOMI XCH<sub>4</sub> over the coastal area of Iran, Iraq and Kuwait in 2019. The sources passing the temporal filter are marked with blue “+”. (b) EDGAR v7.0 averaged annual methane total emission in 2019. (c) Energy-related methane emissions from EDGAR v7.0 overlapped with the industrial heat sources identified by VIIRS instrument. (d) CEDS v\_2021\_04\_21 averaged annual total methane emissions in 2019. (e) GFEI v2 averaged annual methane emissions from the fuel exploitation in 2019. (f) Averaged annual DECSO v6.2 NO<sub>x</sub> total emission in 2019.

**Table S1. The annual emissions of EDGAR and TROPOMI**

| West of Turkmenistan [37.0°N, 53.0°E, 40°N, 55°E]       |      |      |      |      |
|---------------------------------------------------------|------|------|------|------|
| kt/yr                                                   | 2018 | 2019 | 2020 | 2021 |
| EDGAR total                                             | 592  | 601  | 746  | 525  |
| EDGAR energy                                            | 591  | 600  | 744  | 524  |
| TROPOMI all sources                                     | 2826 | 2429 | 2426 | 2692 |
| TROPOMI constant sources                                | 1633 | 1544 | 1484 | 1413 |
| Tehran [35.2°N, 50.6°E, 36°N, 52°E]                     |      |      |      |      |
| kt/yr                                                   | 2018 | 2019 | 2020 | 2021 |
| EDGAR total                                             | 132  | 131  | 133  | 140  |
| EDGAR energy                                            | 25   | 21   | 21   | 25   |
| TROPOMI all sources                                     | 219  | 273  | 202  | 187  |
| TROPOMI constant sources                                | 147  | 207  | 178  | 153  |
| Isfahan [32.4°N, 51.2°E, 32.8°N, 52.0°E]                |      |      |      |      |
| kt/yr                                                   | 2018 | 2019 | 2020 | 2021 |
| EDGAR total                                             | 32   | 32   | 32   | 35   |
| EDGAR energy                                            | 10   | 9    | 9    | 12   |
| TROPOMI all sources                                     | 129  | 113  | 112  | 126  |
| TROPOMI constant sources                                | 113  | 103  | 108  | 115  |
| Iraq & Iran coastal area [29.6°N, 47.0°E, 32.6°N, 51°E] |      |      |      |      |
| kt/yr                                                   | 2018 | 2019 | 2020 | 2021 |
| EDGAR total                                             | 4796 | 4327 | 4168 | 5102 |
| EDGAR energy                                            | 4725 | 4255 | 4094 | 5026 |
| TROPOMI all sources                                     | 3570 | 3484 | 3220 | 3781 |
| TROPOMI constant sources                                | 1037 | 1156 | 927  | 1280 |
| Riyadh [24.4°N, 46.4°E, 25°N, 47°E]                     |      |      |      |      |
| kt/yr                                                   | 2018 | 2019 | 2020 | 2021 |
| EDGAR total                                             | 264  | 267  | 276  | 280  |
| EDGAR energy                                            | 66   | 64   | 69   | 67   |
| TROPOMI all sources                                     | 171  | 184  | 177  | 188  |
| TROPOMI constant sources                                | 100  | 88   | 85   | 88   |



**Table S2. The annual emissions derived with non-divergent and uncorrected wind**

| West of Turkmenistan [37.0°N, 53.0°E, 40°N, 55°E]       |       |      |      |      |
|---------------------------------------------------------|-------|------|------|------|
| kt/yr                                                   | 2018  | 2019 | 2020 | 2021 |
| EDGAR total                                             | 592   | 601  | 746  | 525  |
| All sources (non-divergent <i>w</i> )                   | 2826  | 2429 | 2426 | 2692 |
| All sources (uncorrected <i>w</i> )                     | 691   | 676  | 663  | 540  |
| Tehran [35.2°N, 50.6°E, 36°N, 52°E]                     |       |      |      |      |
| kt/yr                                                   | 2018  | 2019 | 2020 | 2021 |
| EDGAR total                                             | 132   | 131  | 133  | 140  |
| All sources (non-divergent <i>w</i> )                   | 219   | 273  | 202  | 187  |
| All sources (uncorrected <i>w</i> )                     | 202   | 214  | 165  | 185  |
| Isfahan [32.4°N, 51.2°E, 32.8°N, 52.0°E]                |       |      |      |      |
| kt/yr                                                   | 2018  | 2019 | 2020 | 2021 |
| EDGAR total                                             | 32.00 | 32   | 32   | 35   |
| All sources (non-divergent <i>w</i> )                   | 129   | 113  | 112  | 126  |
| All sources (uncorrected <i>w</i> )                     | 122   | 87   | 104  | 113  |
| Iraq & Iran coastal area [29.6°N, 47.0°E, 32.6°N, 51°E] |       |      |      |      |
| kt/yr                                                   | 2018  | 2019 | 2020 | 2021 |
| EDGAR total                                             | 4796  | 4327 | 4168 | 5102 |
| All sources (non-divergent <i>w</i> )                   | 3570  | 3484 | 3220 | 3781 |
| All sources (uncorrected <i>w</i> )                     | 3079  | 2886 | 2363 | 3213 |
| Riyadh [24.4°N, 46.4°E, 25°N, 47°E]                     |       |      |      |      |
| kt/yr                                                   | 2018  | 2019 | 2020 | 2021 |
| EDGAR total                                             | 264   | 267  | 276  | 280  |
| All sources (non-divergent <i>w</i> )                   | 171   | 184  | 177  | 188  |
| All sources (uncorrected <i>w</i> )                     | 153   | 175  | 152  | 133  |
